# Supplementary material for: Evaluating Antimicrobial Resistance Trends in Commensal Escherichia coli Isolated from Cecal Samples of Swine at Slaughter in the United States, 2013–2019
Source: MDPI journal article supplement (doi:10.3390/microorganisms11041033), 2023-04-15
Supplement: s1 [file s1]

**Supplementary Table S1.** Less common antimicrobial resistance patterns in commensal *Escherichia coli* (n = 230) isolated from cecal swine samples at slaughter across the United States, 2013-2019.

| Antimicrobial resistance pattern <sup>a</sup> | n=230 (%) | Number of classes | MDR(Y/N) |
|-----------------------------------------------|-----------|-------------------|----------|
| GEN                                           | 1 (0.03)  | 1                 | N        |
| COT                                           | 1 (0.03)  | 1                 | N        |
| CIP                                           | 3 (0.09)  | 1                 | N        |
| CHL                                           | 2 (0.06)  | 1                 | N        |
| AMP-COT                                       | 1 (0.03)  | 2                 | N        |
| AMP-STR                                       | 6 (0.18)  | 2                 | N        |
| CHL-STR                                       | 3 (0.09)  | 2                 | N        |
| CHL-CIP                                       | 1 (0.03)  | 2                 | N        |
| CIP-NAL                                       | 2 (0.06)  | 1                 | N        |
| COT-STR                                       | 2 (0.06)  | 2                 | N        |
| CIP-STR                                       | 1 (0.03)  | 2                 | N        |
| AZI-TET                                       | 3 (0.09)  | 2                 | N        |
| AZI-STR                                       | 1 (0.03)  | 2                 | N        |
| NAL-TET                                       | 1 (0.03)  | 2                 | N        |
| GEN-TET                                       | 1 (0.03)  | 2                 | N        |
| GEN-STR                                       | 2 (0.06)  | 1                 | N        |
| GEN-AMP                                       | 3 (0.09)  | 2                 | N        |
| AMP-AXO                                       | 2 (0.06)  | 1                 | N        |
| AMC-AMP-TET                                   | 4 (0.12)  | 2                 | N        |
| AMP-AXO-STR                                   | 1 (0.03)  | 2                 | N        |
| AMP-AXO-TET                                   | 3 (0.09)  | 2                 | N        |
| AMP-CHL-COT                                   | 1 (0.03)  | 3                 | Y        |
| AMP-CHL-STR                                   | 2 (0.06)  | 3                 | Y        |
| AMP-CIP-NAL                                   | 2 (0.06)  | 2                 | N        |
| AMP-CIP-TET                                   | 6 (0.18)  | 3                 | Y        |
| AMP-COT-TET                                   | 5 (0.15)  | 3                 | Y        |
| AMP-GEN-TET                                   | 1 (0.03)  | 3                 | Y        |
| AMP-GEN-STR                                   | 1 (0.03)  | 2                 | N        |
| FOX-STR-TET                                   | 1 (0.03)  | 3                 | Y        |
| AZI-COT-TET                                   | 1 (0.03)  | 3                 | Y        |
| CIP-NAL-TET                                   | 7 (0.21)  | 2                 | N        |
| CIP-NAL-STR                                   | 2 (0.06)  | 2                 | N        |
| CHL-COT-TET                                   | 5 (0.15)  | 3                 | Y        |
| CHL-CIP-TET                                   | 1 (0.03)  | 3                 | Y        |
| CHL-CIP-NAL                                   | 1 (0.03)  | 3                 | Y        |
| AMC-AMP-COT-STR                               | 1 (0.03)  | 3                 | Y        |
| AMC-AMP-FOX-TET                               | 2 (0.06)  | 2                 | N        |
| AMC-AMP-STR-TET                               | 1 (0.03)  | 3                 | Y        |
| AMP-AXO-CIP-NAL                               | 1 (0.03)  | 2                 | N        |

|                         |          |   |   |
|-------------------------|----------|---|---|
| AMP-AXO-STR-TET         | 1 (0.03) | 3 | Y |
| AMP-AZI-COT-TET         | 1 (0.03) | 4 | Y |
| AMP-CHL-COT-STR         | 2 (0.06) | 4 | Y |
| AMP-CHL-COT-TET         | 5 (0.15) | 4 | Y |
| AMP-CIP-NAL-TET         | 3 (0.09) | 3 | Y |
| AMP-CIP-STR-TET         | 5 (0.15) | 4 | Y |
| AMP-COT-GEN-TET         | 1 (0.03) | 4 | Y |
| AMP-GEN-STR-TET         | 3 (0.09) | 3 | Y |
| AMP-CIP-COT-TET         | 2 (0.06) | 4 | Y |
| CIP-NAL-STR-TET         | 1 (0.03) | 3 | Y |
| COT-GEN-STR-TET         | 2 (0.06) | 3 | Y |
| CHL-NAL-STR-TET         | 1 (0.03) | 4 | Y |
| CHL-GEN-STR-TET         | 2 (0.06) | 3 | Y |
| CHL-COT-STR-TET         | 5 (0.15) | 4 | Y |
| CHL-COT-NAL-TET         | 2 (0.06) | 4 | Y |
| CHL-CIP-STR-TET         | 1 (0.03) | 4 | Y |
| AZI-COT-STR-TET         | 2 (0.06) | 4 | Y |
| AXO-FOX-STR-TET         | 1 (0.03) | 3 | Y |
| AMC-AMP-AXO-FOX-STR     | 2 (0.06) | 2 | N |
| AMC-AMP-AXO-FOX-GEN     | 1 (0.03) | 2 | N |
| AMC-AMP-FOX-STR-TET     | 1 (0.03) | 3 | Y |
| AMP-AXO-CHL-STR-TET     | 1 (0.03) | 4 | Y |
| AMP-AXO-CIP-GEN-TET     | 4 (0.12) | 4 | Y |
| AMP-AXO-COT-STR-TET     | 5 (0.15) | 4 | Y |
| AMP-AXO-GEN-STR-TET     | 1 (0.03) | 3 | Y |
| AMP-CHL-GEN-STR-TET     | 3 (0.09) | 4 | Y |
| AMP-CIP-COT-GEN-NAL     | 1 (0.03) | 4 | Y |
| AMP-CHL-CIP-NAL-TET     | 1 (0.03) | 4 | Y |
| AMP-CIP-NAL-STR-TET     | 2 (0.06) | 4 | Y |
| AMP-CIP-COT-STR-TET     | 3 (0.09) | 5 | Y |
| CHL-CIP-NAL-STR-TET     | 2 (0.06) | 4 | Y |
| CHL-CIP-COT-STR-TET     | 3 (0.09) | 5 | Y |
| CHL-CIP-COT-NAL-TET     | 1 (0.03) | 4 | Y |
| AMP-COT-GEN-STR-TET     | 5 (0.15) | 4 | Y |
| AZI-CHL-COT-STR-TET     | 1 (0.03) | 5 | Y |
| AZI-COT-GEN-STR-TET     | 1 (0.03) | 4 | Y |
| CHL-CIP-COT-NAL-TET-STR | 1 (0.03) | 5 | Y |
| AZI-CHL-CIP-COT-NAL-TET | 1 (0.03) | 5 | Y |
| AMC-AMP-AXO-CHL-FOX-TET | 2 (0.06) | 3 | Y |
| AMC-AMP-AXO-CIP-FOX-TET | 1 (0.03) | 3 | Y |
| AMC-AMP-AXO-COT-FOX-TET | 2 (0.06) | 3 | Y |
| AMC-AMP-AXO-CIP-FOX-NAL | 1 (0.03) | 2 | N |
| AMP-CIP-COT-NAL-STR-TET | 2 (0.06) | 5 | Y |
| AMP-AXO-CIP-GEN-NAL-TET | 1 (0.03) | 4 | Y |

---

|                                                 |          |   |   |
|-------------------------------------------------|----------|---|---|
| AMP-CHL-COT-GEN-STR-TET                         | 1 (0.03) | 5 | Y |
| AMP-CHL-CIP-COT-STR-TET                         | 4 (0.12) | 6 | Y |
| AMP-CHL-CIP-COT-NAL-TET                         | 1 (0.03) | 5 | Y |
| AMP-AXO-CIP-NAL-STR-TET                         | 1 (0.03) | 4 | Y |
| AMP-AXO-CHL-GEN-STR-TET                         | 1 (0.03) | 4 | Y |
| AMP-AXO-CHL-COT-STR-TET                         | 1 (0.03) | 5 | Y |
| AMP-AXO-CHL-CIP-STR-TET                         | 2 (0.06) | 5 | Y |
| AMP-AXO-CHL-CIP-NAL-TET                         | 1 (0.03) | 4 | Y |
| AMP-AXO-CHL-CIP-COT-TET                         | 1 (0.03) | 5 | Y |
| AMP-AZI-COT-GEN-STR-TET                         | 1 (0.03) | 5 | Y |
| AMP-AZI-CHL-COT-STR-TET                         | 3 (0.09) | 6 | Y |
| AMC-AMP-AXO-CHL-FOX-STR-TET                     | 6 (0.18) | 4 | Y |
| AMC-AMP-AXO-FOX-GEN-STR-TET                     | 1 (0.03) | 3 | Y |
| AMC-AMP-AXO-CIP-FOX-NAL TET                     | 3 (0.09) | 3 | Y |
| AMC-AMP-AXO-AZI-FOX-STR-TET                     | 2 (0.06) | 4 | Y |
| AMP-CHL-CIP-COT-NAL-STR-TET                     | 3 (0.09) | 6 | Y |
| AMP-AXO-CHL-CIP-NAL-STR-TET                     | 1 (0.03) | 5 | Y |
| AMP-AXO-CHL-CIP-GEN-NAL-TET                     | 2 (0.06) | 5 | Y |
| AMP-AXO-AZI-CHL-CIP-COT-TET                     | 1 (0.03) | 6 | Y |
| AMP-AZI-CHL-CIP-COT-NAL-STR-TET                 | 2 (0.06) | 7 | Y |
| AMP-AXO-CHL-CIP-COT-NAL-STR-TET                 | 2 (0.06) | 6 | Y |
| AMC-AMP-AXO-COT-FOX-GEN-STR-TET                 | 1 (0.03) | 4 | Y |
| AMC-AMP-AXO-CHL-FOX-GEN-STR-TET                 | 2 (0.06) | 4 | Y |
| AMC-AMP-AXO-CHL-COT-FOX-GEN-STR                 | 1 (0.03) | 4 | Y |
| AMC-AMP-AXO-CHL-CIP-FOX-STR-TET                 | 1 (0.03) | 5 | Y |
| AMC-AMP-AXO-AZI-CHL-FOX-STR-TET                 | 1 (0.03) | 5 | Y |
| AMC-AMP-AXO-CHL-COT-FOX-GEN-STR-TET             | 2 (0.06) | 5 | Y |
| AMC-AMP-AXO-CHL-CIP-COT-FOX-STR-TET             | 1 (0.03) | 6 | Y |
| AMC-AMP-AXO-CHL-CIP-COT-FOX-NAL-TET             | 1 (0.03) | 5 | Y |
| AMP-AZI-CHL-CIP-COT-GEN-NAL-STR-TET             | 1 (0.03) | 7 | Y |
| AMC-AMP-AXO-AZI-CHL-CIP-COT-FOX-NAL-TET         | 1 (0.03) | 6 | Y |
| AMC-AMP-AXO-CHL-CIP-COT-FOX-GEN-NAL-STR-TET     | 2 (0.06) | 6 | Y |
| AMC-AMP-AXO-AZI-CIP-COT-FOX-GEN-NAL-STR-TET     | 1 (0.03) | 6 | Y |
| AMC-AMP-AXO-AZI-CHL-CIP-COT-FOX-GEN-NAL-STR-TET | 1 (0.03) | 7 | Y |

<sup>a</sup> AMC- Amoxicillin-Clavulanic acid; AMP- Ampicillin; AXO-Ceftriaxone; AZI- Azithromycin; CHL- Chloramphenicol; CIP- Ciprofloxacin; COT- Trimethoprim-Sulfamethoxazole; FOX- Cefoxitin; GEN- Gentamicin; NAL- Nalidixic Acid; STR- Streptomycin; TET- Tetracycline.
